# Supplementary material for: Feasibility of Duodenal Covered Self-Expandable Metal Stent Fixation: A Pilot Study (With Video)
Source: Research Square preprint supplement (doi:10.21203/rs.3.rs-538859/v1), 2021-06-02
Supplement: Supplementary file 2 [file 9cc8a85196390399b15931fe.xlsx]

## Sheet: C-SEMS+OTSC
Data file. The raw data of the study.
Case	Age	Sex	Primary cancer	Procedure time (C-SEMS only)	Procedure time (OTSC only)	Procedure time (Total)	Success	Stent length	Stent diameter	Obstruction site	Perforation	Hyperamylasia	Pancreatitis	Migration	Pnueumoniae	Bleeding	Stent dysfunction	Chemotherapy	Regimen	Pre-GOOSS	Post-GOOSS	KPS	Re-intervention	Re-intervention day	Ascites	Liver mets	Morphine	Peritoneal dissemination	Survival day	Stent patency
C-SEMS+OTSC 1	82	M	Pancreatic cancer	19	11	30	1	12	20	Bulb	0	0	0	1	0	0	1	0		0	3	80	1	2018-12-04	0	1	0	0	35	21
C-SEMS+OTSC 2	96	F	Gastric cancer	20	21	41	1	12	20	Pylous	0	0	0	0	0	0	0	0		0	2	50	0		0	0	0	0	134	134
C-SEMS+OTSC 3	57	M	Pancreatic cancer	33	9	42	1	12	20	2nd	0	0	0	0	0	0	0	0		0	1	20	0		1	1	1	1	17	17
C-SEMS+OTSC 4	74	M	Pancreatic cancer	16	12	28	1	12	20	Bulb	0	0	0	0	0	0	0	0		0	3	50	0		0	1	0	0	84	84
C-SEMS+OTSC 5	78	M	GB cancer	21	6	27	1	12	20	Bulb	0	0	0	0	0	0	0	1	S-1	0	3	90	0		0	1	0	0	98	98
C-SEMS+OTSC 6	78	F	Pancreatic cancer	35	12	47	1	12	20	3rd	0	0	0	0	0	0	0	1	S-1	1	3	90	0		0	0	0	0	192	192
C-SEMS+OTSC 7	80	M	Pancreatic cancer	19	8	27	1	12	20	3rd	0	0	0	0	0	0	0	0		0	3	80	0		0	0	0	0	91	91
C-SEMS+OTSC 8	71	M	Pancreatic cancer	21	8	29	1	12	20	3rd	0	0	0	0	0	0	0	0		0	2	20	0		0	0	1	0	20	20
C-SEMS+OTSC 9	95	F	Pancreatic cancer	42	8	50	1	12	20	3rd	0	0	0	0	0	0	0	0		0	3	50	0		1	0	0	1	84	84
C-SEMS+OTSC 10	60	F	Pancreatic cancer	17	8	25	1	12	20	3rd	0	0	0	0	0	0	0	0		0	2	60	0		1	1	0	1	15	15
C-SEMS+OTSC 11	48	M	Gastric cancer	25	4	29	1	12	20	2nd	0	0	0	0	0	0	0	0		0	1	10	0		0	1	1	1	23	23
C-SEMS+OTSC 12	54	M	Pancreatic cancer	12	9	21	1	12	20	Bulb	0	0	0	0	0	0	0	1	S-1	0	3	80	0		1	0	0	1	101	101
C-SEMS+OTSC 13	43	M	Colon cancer	20	3	23	1	12	20	2nd	0	0	0	0	0	0	0	1	S-1	0	3	80	0		0	1	0	1	74	74
C-SEMS+OTSC 14	81	F	Renal cancer	24	5	29	1	12	20	3rd	0	0	0	0	0	0	0	0		0	3	80	0		0	0	0	1	115	115
C-SEMS+OTSC 15	80	M	Gastric cancer	25	9	34	1	12	20	Pylous	0	0	0	0	0	0	0	0		0	3	60	0		0	0	0	0	149	149
